# Supplementary material for: In situ supported MnOx–CeOx on carbon nanotubes for the low-temperature selective catalytic reduction of NO with NH3
Source: Royal Society of Chemistry journal article supplement (doi:10.1039/c2nr33006g), 2012-12-04
Supplement: c2nr33006g.pdf [file c2nr33006g.pdf]

*Electronic Supplementary Information (ESI)*

## ***In situ* supported MnO<sub>x</sub>-CeO<sub>x</sub> on carbon nanotubes for the low-temperature selective catalytic reduction of NO with NH<sub>3</sub>**

**Dengsong Zhang,<sup>\*a,b</sup> Lei Zhang,<sup>a</sup> Liyi Shi,<sup>\*b,c</sup> Cheng Fang,<sup>b,c</sup> Hongrui Li,<sup>a</sup> Ruihua Gao,<sup>a</sup> Lei Huang,<sup>a</sup> and Jianping Zhang<sup>b</sup>**

<sup>a</sup> *Research Center of Nano Science and Technology, Shanghai University, Shanghai 200444, China.*

*Fax: 86 21 66134852; E-mail: dszhang@shu.edu.cn*

<sup>b</sup> *Department of Chemistry, Shanghai University, Shanghai 200444, China. E-mail: shiliyi@shu.edu.cn*

<sup>c</sup> *School of Material Science and Engineering, Shanghai University, Shanghai 200072, China.*

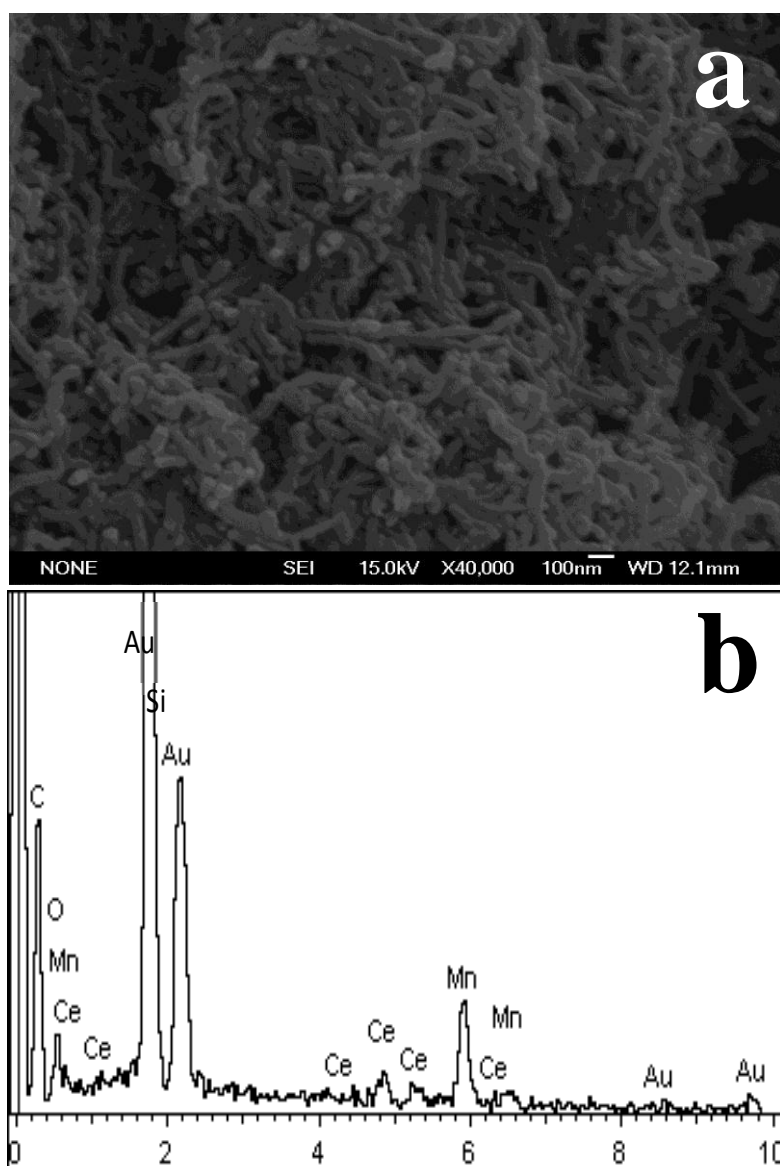

**Fig. S1** (a) SEM image; and (b) EDS analysis of MnCe@CNTs-R.

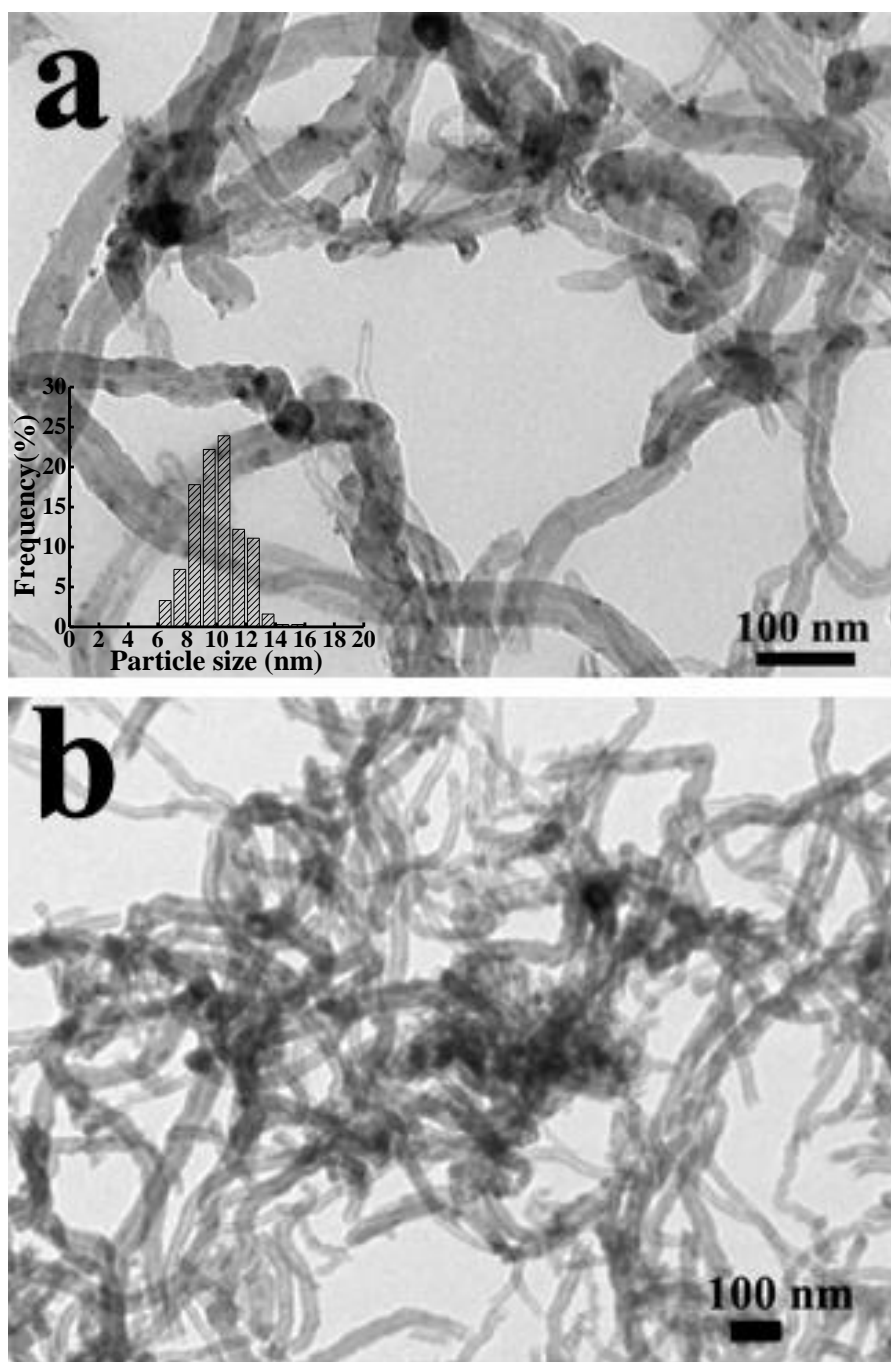

**Fig. S2** TEM images of (a) MnCe/CNTs-I and (b) MnCe/CNTs-M.

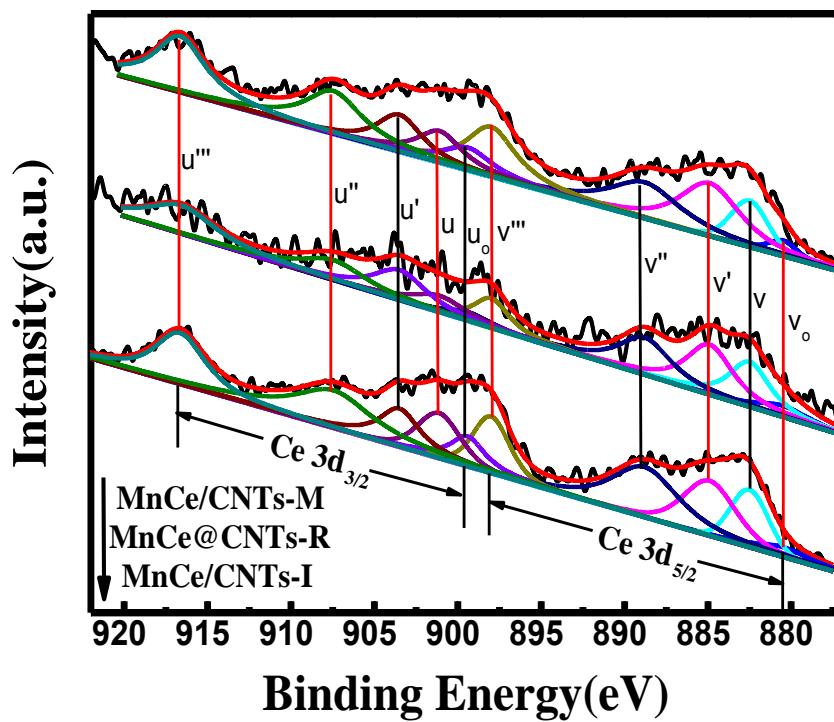

Fig. S3 XPS spectra for Ce 3d of the catalyst samples
